# Supplementary material for: Synthesis, structure and magnetic behavior of iron arsenites with hierarchical magnetic units
Source: Royal Society of Chemistry journal article supplement (doi:10.1039/d0qi00887g), 2020-01-01
Supplement: d0qi00887g1.pdf [file d0qi00887g1.pdf]

## SUPPORTING INFORMATION

### **Synthesis, Structure and Magnetic behavior of iron arsenites with hierarchical magnetic units**

Leclercq Bastien<sup>α</sup>, Houria Kabbour<sup>α</sup>, Angel M. Arevalo-Lopez<sup>α</sup>, Sylvie Daviero-Minaud<sup>α</sup>, Claire Minaud<sup>β</sup>, Régnald David<sup>α</sup> and Olivier Mentré<sup>α,\*</sup>

<sup>α</sup> UCCS, UMR-CNRS 8181, Bâtiment C7 Ecole Centrale, Université Lille, Avenue Mendeleiev, 59655 Villeneuve d'Ascq, France.

<sup>β</sup> Institut Chevreul, Bâtiment C4, Université Lille, Cité scientifique, 59655 Villeneuve d'Ascq, France.

\* : corresponding author

## Table of contents

|                                                                                                                                                                                                                                         |            |
|-----------------------------------------------------------------------------------------------------------------------------------------------------------------------------------------------------------------------------------------|------------|
| <b>S1. Synthesis strategies Aspects.....</b>                                                                                                                                                                                            | <b>S4</b>  |
| <i>Figure S1. Superposition of the Pourbaix diagrams of Iron and Arsenic species.....</i>                                                                                                                                               | <i>S4</i>  |
| <b>S2. Structural and refinement datas.....</b>                                                                                                                                                                                         | <b>S5</b>  |
| <i>Table S2a. Atomic positions and equivalent isotropic thermal displacement for <math>Ba_2Fe(As_3O_6)_2 \cdot H_2O</math>.....</i>                                                                                                     | <i>S5</i>  |
| <i>Table S2b. Anisotropic thermal displacement for <math>Ba_2Fe(As_3O_6)_2 \cdot H_2O</math>.....</i>                                                                                                                                   | <i>S5</i>  |
| <i>Table S2c. Pertinent interatomic distances (<math>\text{\AA}</math>) and corresponding bond-valence sum calculations for <math>Ba_2Fe(As_3O_6)_2 \cdot H_2O</math>.....</i>                                                          | <i>S6</i>  |
| <i>Table S2d. Atomic positions and equivalent isotropic thermal displacement for <math>BaFe_2As_2O_5AsO_3OH</math>.....</i>                                                                                                             | <i>S7</i>  |
| <i>Table S2e. Anisotropic thermal displacement for <math>BaFe_2As_2O_5AsO_3OH</math>.....</i>                                                                                                                                           | <i>S7</i>  |
| <i>Table S2f. Pertinent interatomic distances (<math>\text{\AA}</math>) and corresponding bond-valence sum calculations for <math>BaFe_2As_2O_5AsO_3OH</math>.....</i>                                                                  | <i>S8</i>  |
| <i>Table S2g. Atomic positions and equivalent isotropic thermal displacement for <math>Ba_2Fe_2O(As_2O_5)_2</math>.....</i>                                                                                                             | <i>S8</i>  |
| <i>Table S2h. Anisotropic thermal displacement for <math>Ba_2Fe_2O(As_2O_5)</math>.....</i>                                                                                                                                             | <i>S8</i>  |
| <i>Table S2i. Pertinent interatomic distances (<math>\text{\AA}</math>) and corresponding bond-valence sum calculations for <math>Ba_2Fe_2O(As_2O_5)</math>.....</i>                                                                    | <i>S9</i>  |
| <i>Table S2j. Atomic positions and equivalent isotropic thermal displacement for <math>Fe_3(As_2O_5)(AsO_3)Cl</math>.....</i>                                                                                                           | <i>S9</i>  |
| <i>Table S2k. Anisotropic thermal displacement for <math>Fe_3(As_2O_5)(AsO_3)Cl</math>.....</i>                                                                                                                                         | <i>S10</i> |
| <i>Table S2l. Pertinent interatomic distances (<math>\text{\AA}</math>) and corresponding bond-valence sum calculations for <math>Fe_3(As_2O_5)(AsO_3)Cl</math>.....</i>                                                                | <i>S10</i> |
| <i>Figure S2m. Representation of the lone pair (in yellow) obtained from electron localisation function (ELF) calculations.....</i>                                                                                                     | <i>S11</i> |
| <i>Figure S2n. Infrared spectra for <math>BaFe_2As_2O_5AsO_3OH</math> and <math>Fe_3(As_2O_5)(AsO_3)Cl</math>.....</i>                                                                                                                  | <i>S12</i> |
| <b>S3. EDS-SEM analysis.....</b>                                                                                                                                                                                                        | <b>S13</b> |
| <i>Figure S3. EDS-SEM analysis, and resulting formula obtained from several averaged % Atomic points acquisition.....</i>                                                                                                               | <i>S13</i> |
| <b>S4. DFT calculations details.....</b>                                                                                                                                                                                                | <b>S14</b> |
| <i>Table S4a. Relative energies for the different magnetic configurations used to extract the magnetic exchanges parameters within <math>Ba_2Fe(As_3O_6)_2 \cdot H_2O</math> structure, at <math>U_{eff} = 6 \text{ eV}</math>.....</i> | <i>S14</i> |
| <br><i>Figure S4b. Representation of the four ordered spin stated employed to extract the two spin exchange parameters for <math>Ba_2Fe(As_3O_6)_2 \cdot H_2O</math> structure.....</i>                                                 | <i>S14</i> |
| <i>Table S4c. Values of the geometrical parameters (distances in <math>\text{\AA}</math> and angles in <math>^\circ</math>) along the magnetic exchanges paths for <math>BaFe_2As_2O_5AsO_3OH</math> structure.....</i>                 | <i>S15</i> |
| <i>Table S4d. Relative energies for the different magnetic configurations used to extract the magnetic exchanges parameters for <math>BaFe_2As_2O_5AsO_3OH</math>.....</i>                                                              | <i>S16</i> |
| <br><i>Figure S4e. Representation of the nine ordered spin stated employed to extract the five spin exchanges parameters (<math>J_1, J_2, J_d, J_3, J_4</math>) for <math>BaFe_2As_2O_5AsO_3OH</math> structure.....</i>                | <i>S17</i> |
| <i>Table S4f. Values of the geometrical parameters (distances in <math>\text{\AA}</math> and angles in <math>^\circ</math>) along the magnetic exchanges paths for <math>Ba_2Fe_2O(As_2O_5)_2</math> structure.....</i>                 | <i>S18</i> |
| <i>Table S4g. Relative energies for the different magnetic configurations used to extract the magnetic exchanges parameters for <math>Ba_2Fe_2O(As_2O_5)_2</math> structure.....</i>                                                    | <i>S18</i> |
| <i>Figure S4h. Representation of the five ordered spin stated employed to extract the three spin exchanges parameters for <math>Ba_2Fe_2O(As_2O_5)_2</math> structure.....</i>                                                          | <i>S19</i> |

|                                                                                                                                                                                                                                                        |            |
|--------------------------------------------------------------------------------------------------------------------------------------------------------------------------------------------------------------------------------------------------------|------------|
| <i>Table S4i. Values of the geometrical parameters (distances in Å and angles in °) along the magnetic exchanges paths for <math>Fe_3(As_2O_5)(AsO_3)Cl</math> structure.....</i>                                                                      | <i>S20</i> |
| <i>Table S4j. Relative energies for the different magnetic configurations used to extract the magnetic exchanges parameters for <math>Fe_3(As_2O_5)(AsO_3)Cl</math> structure.....</i>                                                                 | <i>S20</i> |
| <i>Figure S4k. Representation of the six pertinent ordered spin stated employed to extract the global trends in couplings for <math>Fe_3(As_2O_5)(AsO_3)Cl</math> structure.....</i>                                                                   | <i>S21</i> |
| <i>Table S4l. Comparison between the crystallographically calculated BVS and obtained magnetic moment from DFT calculations for each Fe cations within the simple cell <math>Fe_3(As_2O_5)(AsO_3)Cl</math> structure at <math>U = 6</math> eV.....</i> | <i>S21</i> |
| <b>S5. Magnetic measurements details.....</b>                                                                                                                                                                                                          | <b>S22</b> |
| <i>Figure S5a. Cheking purity of <math>Fe_3(As_2O_5)(AsO_3)Cl</math> sample from powder XRD.....</i>                                                                                                                                                   | <i>S22</i> |
| <i>Figure S5b. <math>M(H)</math> measurements between 0 and 9 T for <math>BaFe_2(As_2O_5)(AsO_3)(OH)</math>, <math>Ba_2Fe_2O(As_2O_5)_2</math> and <math>Fe_3(As_2O_5)(AsO_3)Cl</math>.....</i>                                                        | <i>S22</i> |

### (S1) Synthesis strategies aspect

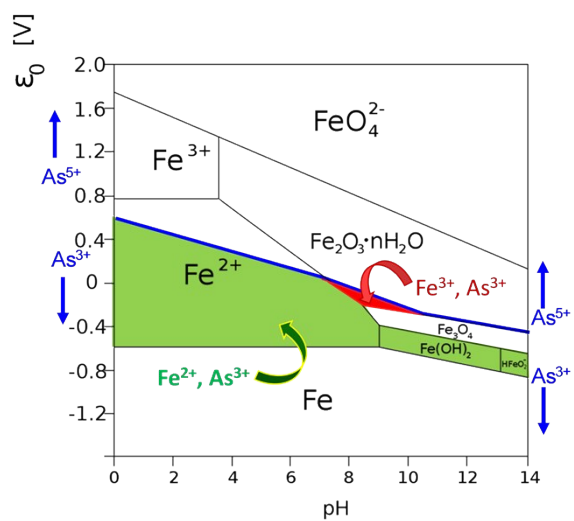

Figure S1. Schematized superposed Fe/As Pourbaix diagrams. The narrow area in red allowing the coexistence of  $\text{Fe}^{3+}$  and  $\text{As}^{3+}$  in solution ( $\rightarrow$  the formation of compound **(2)** and **(3)**, prepared around  $\text{pH} = 9$ ). The area in green represents the possible coexistence of  $\text{Fe}^{2+}$  and  $\text{As}^{3+}$  in solution, leading to the formation of compound **(1)** ( prepared around  $\text{pH} = 7$ ).

## (S2) Structural and refinement data

Table S2a. Atomic positions and equivalent isotropic thermal displacement (in Å<sup>2</sup>) for Ba<sub>2</sub>Fe(As<sub>3</sub>O<sub>6</sub>)<sub>2</sub>.H<sub>2</sub>O.

| Atom  | Wick. | Site | x          | y          | z           | Ueq (Å <sup>2</sup> ) |
|-------|-------|------|------------|------------|-------------|-----------------------|
| Ba_1  | 4a    | 1    | 0.4639(1)  | 0.5814(1)  | 0.0083(1)   | 0.0223(2)             |
| Ba_2  | 4a    | 1    | -0.4639(1) | -0.0814(1) | -0.0083(1)  | 0.0223(2)             |
| As1_1 | 4a    | 1    | 0.3479(1)  | 0.3448(1)  | -0.2172(2)  | 0.0194(4)             |
| As1_2 | 4a    | 1    | -0.3479(1) | 0.1552(1)  | 0.2172(2)   | 0.0194(4)             |
| As2_1 | 4a    | 1    | 0.3556 (1) | 0.3243(1)  | 0.3154(1)   | 0.0191(4)             |
| As2_2 | 4a    | 1    | -0.3556(1) | 0.1751(1)  | -0.3154(1)  | 0.0191(4)             |
| As3_1 | 4a    | 1    | 0.3546(1)  | 0.5729(1)  | -0.4887(1)  | 0.0184(4)             |
| As3_2 | 4a    | 1    | -0.3546(1) | -0.0729(1) | 0.4896(1)   | 0.0184(4)             |
| Fe    | 4a    | 1    | 0.50000    | 0.25000    | 0.00000     | 0.0179(7)             |
| O1_1  | 4a    | 1    | 0.4371(5)  | 0.6091(7)  | -0.3819(12) | 0.0219(19)            |
| O1_2  | 4a    | 1    | -0.4371(5) | -0.1091(7) | 0.3819(12)  | 0.0219(19)            |
| O2_1  | 4a    | 1    | 0.3954(5)  | 0.4653(8)  | 0.3472(13)  | 0.029(2)              |
| O2_2  | 4a    | 1    | -0.3954(5) | 0.0347(8)  | -0.3472(13) | 0.029(2)              |
| O3_1  | 4a    | 1    | 0.3130(5)  | 0.4778(8)  | -0.3138(12) | 0.0236(19)            |
| O3_2  | 4a    | 1    | -0.3130(5) | 0.0222(8)  | 0.3138(12)  | 0.0236(19)            |
| O4_1  | 4a    | 1    | 0.4369(6)  | 0.3797(9)  | -0.1552(14) | 0.031(2)              |
| O4_2  | 4a    | 1    | -0.4369(6) | 0.1203(9)  | 0.1552(14)  | 0.031(2)              |
| O5_1  | 4a    | 1    | 0.3657(7)  | 0.2776(10) | -0.4369(16) | 0.047(3)              |
| O5_2  | 4a    | 1    | -0.3657(7) | 0.2225(10) | 0.4369(16)  | 0.047(3)              |
| O6_1  | 4a    | 1    | 0.4369(5)  | 0.2589(9)  | 0.2492(14)  | 0.033(2)              |
| O6_2  | 4a    | 1    | -0.4369(5) | 0.2411(9)  | -0.2492(14) | 0.033(2)              |
| O7_1  | 4a    | 1    | 0.2962(4)  | 0.5636(15) | 0.0608(12)  | 0.042(5)              |
| H_1   | 4a    | 1    | 0.26886    | 0.55083    | 0.16736     | 0.042(5)              |
| H_2   | 4a    | 1    | 0.26902    | 0.60385    | -0.02384    | 0.042(5)              |

Table S2b. Anisotropic thermal displacement (in Å<sup>2</sup>) for Ba<sub>2</sub>Fe(As<sub>3</sub>O<sub>6</sub>)<sub>2</sub>.H<sub>2</sub>O.

| Atom  | U <sub>11</sub> | U <sub>22</sub> | U <sub>33</sub> | U <sub>12</sub> | U <sub>13</sub> | U <sub>23</sub> |
|-------|-----------------|-----------------|-----------------|-----------------|-----------------|-----------------|
| Ba_1  | 0.0410(5)       | 0.0115(4)       | 0.0143(4)       | 0.0014(3)       | -0.0021(3)      | -0.0013(3)      |
| Ba_2  | 0.0410(5)       | 0.0115(4)       | 0.0143(4)       | 0.0014(3)       | -0.0021(3)      | -0.0013(3)      |
| As1_1 | 0.0284(7)       | 0.0151(6)       | 0.0147(6)       | -0.0025(5)      | 0.0023(5)       | 0.0023(5)       |
| As1_2 | 0.0284(7)       | 0.0151(6)       | 0.0147(6)       | -0.0025(5)      | 0.0023(5)       | 0.0023(5)       |
| As2_1 | 0.0307(7)       | 0.0107(6)       | 0.0160(6)       | -0.0003(5)      | -0.0058(5)      | -0.0012(5)      |
| As2_2 | 0.0307(7)       | 0.0107(6)       | 0.0160(6)       | -0.0003(5)      | -0.0058(5)      | -0.0012(5)      |
| As3_1 | 0.0280(7)       | 0.0074(5)       | 0.0196(6)       | 0.0011(5)       | 0.0002(5)       | 0.0011(5)       |
| As3_2 | 0.0280(7)       | 0.0074(5)       | 0.0196(6)       | 0.0011(5)       | 0.0002(5)       | 0.0011(5)       |
| Fe    | 0.0278(13)      | 0.0081(11)      | 0.0179(11)      | 0.0014(10)      | -0.0020(10)     | 0.0002(9)       |

Table S2c. Pertinent interatomic distances (Å) and corresponding bond-valence sum calculations for Ba<sub>2</sub>Fe(As<sub>3</sub>O<sub>6</sub>)<sub>2</sub>.H<sub>2</sub>O.

| <b>Ba</b>        |           | <b>Fe</b>        |           | <b>As</b>        |           |
|------------------|-----------|------------------|-----------|------------------|-----------|
| Ba_1—O1_1        | 2.776(8)  | Fe—O1_1          | 2.174(9)  | As2_2—O2_2       | 1.829(10) |
| Ba_1—O1_1        | 2.968(9)  | Fe—O1_2          | 2.174(9)  | As2_2—O5_2       | 1.819(12) |
| Ba_1—O2_1        | 2.992(9)  | Fe—O4_1          | 2.192(10) | As2_2—O6_2       | 1.712(10) |
| Ba_1—O2_1        | 2.812(10) | Fe—O4_2          | 2.192(10) | -                | -         |
| Ba_1—O4_1        | 2.689(10) | Fe—O6_1          | 2.072(10) | As3_1—O1_1       | 1.708(9)  |
| Ba_1—O4_1        | 2.974(10) | Fe—O6_2          | 2.072(10) | As3_1—O2_1       | 1.861(10) |
| Ba_1—O5_2        | 2.956(12) | <b>As</b>        |           | As3_1—O3_1       | 1.817(9)  |
| Ba_1—O6_2        | 2.739(10) | As1_1—O3_1       | 1.823(9)  | -                | -         |
| Ba_1—O7_1        | 3.033(7)  | As1_1—O4_1       | 1.702(10) | As3_2—O1_2       | 1.711(9)  |
| -                | -         | As1_1—O5_1       | 1.753(12) | As3_2—O2_2       | 1.857(10) |
| Ba_2—O1_2        | 2.776(8)  | -                | -         | As3_2—O3_2       | 1.822(9)  |
| Ba_2—O1_2        | 2.968(9)  | As1_2—O3_2       | 1.823(9)  | <b>H</b>         |           |
| Ba_2—O2_2        | 2.992(9)  | As1_2—O4_2       | 1.702(10) | H_1—O7_1         | 0.901(8)  |
| Ba_2—O2_2        | 2.812(10) | As1_2—O5_2       | 1.753(12) | H_1—H_2          | 1.471(1)  |
| Ba_2—O4_2        | 2.689(10) | -                | -         | -                | -         |
| Ba_2—O4_2        | 2.974(10) | As2_1—O2_1       | 1.829(10) | H_2—O7_1         | 0.900(11) |
| Ba_2—O5_1        | 2.956(12) | As2_1—O5_1       | 1.819(12) | H_2—H_1          | 1.471(1)  |
| Ba_2—O6_1        | 2.739(10) | As2_2—O6_1       | 1.712(10) | -                | -         |
| Ba_2—O6_2        | 3.160(10) | -                | -         | -                | -         |
| <b>BVS Ba_1</b>  | 2.02(2)   | <b>BVS Ba_2</b>  | 1.89(2)   | <b>BVS Fe</b>    | 1.99(2)   |
| <b>BVS As1_1</b> | 3.21(4)   | <b>BVS As1_2</b> | 3.18(4)   | <b>BVS As2_1</b> | 2.97(4)   |
| <b>BVS As2_2</b> | 3.00(4)   | <b>BVS As3_1</b> | 2.97(4)   | <b>BVS As3_2</b> | 2.93(4)   |
| <b>BVS O1_1</b>  | 1.93(3)   | <b>BVS O1_2</b>  | 1.92(3)   | <b>BVS O2_1</b>  | 2.20(3)   |
| <b>BVS O2_2</b>  | 2.11(3)   | <b>BVS O3_1</b>  | 1.96(3)   | <b>BVS O3_2</b>  | 2.12(3)   |
| <b>BVS O4_1</b>  | 1.97(3)   | <b>BVS O4_2</b>  | 1.97(3)   | <b>BVS O5_1</b>  | 2.21(4)   |
| <b>BVS O5_2</b>  | 2.26(4)   | <b>BVS O6_1</b>  | 1.98(3)   | <b>BVS O6_2</b>  | 1.98(3)   |
| <b>BVS O7_1</b>  | 1.61(1)   | <b>BVS H_1</b>   | 1.02(1)   | <b>BVS H_2</b>   | 1.04(1)   |

Table S2d. Atomic positions and equivalent isotropic thermal displacement (in Å<sup>2</sup>) for BaFe<sub>2</sub>As<sub>2</sub>O<sub>5</sub>AsO<sub>3</sub>OH.

| Atom     | Wick. | Site | x          | y           | z           | Ueq (Å <sup>2</sup> ) |
|----------|-------|------|------------|-------------|-------------|-----------------------|
| Ba (2+)  | 4g    | ..m  | 0.3206(1)  | 0.2510(2)   | 0           | 0.0200(6)             |
| Fe (3+)  | 8i    | 1    | 0.2569(2)  | 0.0017(4)   | 0.3279(2)   | 0.0193(9)             |
| As1 (3+) | 8i    | 1    | 0.4248(2)  | 0.7419(2)   | -0.1860(2)  | 0.0198(7)             |
| As2 (3+) | 4h    | ..m  | 0.1099(3)  | -0.1952(3)  | 1/2         | 0.0229(11)            |
| O1 (2-)  | 8i    | 1    | 0.3351(10) | 0.5741(15)  | -0.1680(14) | 0.024(3)              |
| O2 (2-)  | 8i    | 1    | 0.3464(10) | -0.0698(15) | 0.1706(13)  | 0.019(3)              |
| O3 (2-)  | 8i    | 1    | 0.3115(8)  | 0.2510(14)  | 0.3471(11)  | 0.014(2)              |
| O4 (2-)  | 4g    | ..m  | 0.5239(13) | 0.263(2)    | 0           | 0.022(4)              |
| O5 (2-)  | 4h    | ..m  | 0.1563(12) | 0.0333(19)  | 1/2         | 0.011(4)              |
| O6 (2-)  | 4h    | ..m  | 0.3481(18) | -0.060(3)   | 1/2         | 0.038(6)              |
| H (1+)   | 4h    | ..m  | 0.406(16)  | -0.13(4)    | 1/2         | 0.12(14)              |

Table S2e. Anisotropic thermal displacement (in Å<sup>2</sup>) for BaFe<sub>2</sub>As<sub>2</sub>O<sub>5</sub>AsO<sub>3</sub>OH.

| Atom | U <sub>11</sub> | U <sub>22</sub> | U <sub>33</sub> | U <sub>12</sub> | U <sub>13</sub> | U <sub>23</sub> |
|------|-----------------|-----------------|-----------------|-----------------|-----------------|-----------------|
| Ba   | 0.0251(12)      | 0.0204(8)       | 0.0144(9)       | -0.0005(10)     | 0.0000          | 0.0000          |
| Fe   | 0.029(2)        | 0.0187(12)      | 0.0106(13)      | 0.0000(14)      | -0.0009(18)     | -0.0011(12)     |
| As1  | 0.0250(14)      | 0.0226(10)      | 0.0118(10)      | -0.0006(11)     | 0.0027(9)       | 0.0001(8)       |
| As2  | 0.032(2)        | 0.0263(16)      | 0.0103(16)      | 0.0010(15)      | 0.0000          | 0.0000          |

Table S2f. Pertinent interatomic distances (Å) and corresponding bond-valence sum calculations for BaFe<sub>2</sub>As<sub>2</sub>O<sub>5</sub>AsO<sub>3</sub>OH.

| Ba             |           | Fe             |           | As            |           |
|----------------|-----------|----------------|-----------|---------------|-----------|
| Ba—O1          | 2.830(12) | Fe—O1          | 1.982(13) | As1—O1        | 1.745(13) |
| Ba—O1          | 2.912(13) | Fe—O2          | 1.942(13) | As1—O2        | 1.757(12) |
| Ba—O1          | 2.830(12) | Fe—O3          | 1.990(11) | As1—O4        | 1.816(7)  |
| Ba—O1          | 2.912(13) | Fe—O3          | 2.077(11) | -             | -         |
| Ba—O2          | 2.843(11) | Fe—O5          | 2.082(11) | -             | -         |
| Ba—O2          | 3.045(12) | Fe—O6          | 2.037(15) | As2—O3        | 1.789(11) |
| Ba—O2          | 2.843(11) | Fe—Fe          | 3.102(3)  | As2—O3        | 1.789(11) |
| Ba—O2          | 3.045(12) | Fe—As2         | 2.919(4)  | As2—O5        | 1.800(15) |
| Ba—O3          | 3.131(10) | -              | -         | As2—O6        | 2.759(15) |
| Ba—O3          | 3.131(10) | -              | -         | <b>H</b>      |           |
| Ba—O4          | 2.768(18) | -              | -         | H—O6          | 1.0(3)    |
| <b>BVS Ba</b>  | 2.00(2)   | <b>BVS Fe</b>  | 3.06(4)   | -             | -         |
| <b>BVS As1</b> | 3.15(5)   | <b>BVS As2</b> | 3.04(6)   | <b>BVS H</b>  | 0.92(5)   |
| <b>BVS O1</b>  | 2.10(4)   | <b>BVS O2</b>  | 2.07(4)   | <b>BVS O3</b> | 2.08(4)   |
| <b>BVS O4</b>  | 2.13(3)   | <b>BVS O5</b>  | 1.84(4)   | <b>BVS O6</b> | 1.9(5)    |

Table S2g. Atomic positions and equivalent isotropic thermal displacement (in Å<sup>2</sup>) for Ba<sub>2</sub>Fe<sub>2</sub>O(As<sub>2</sub>O<sub>5</sub>)<sub>2</sub>.

| Atom    | Wick. | Site | x         | y         | z         | Ueq (Å <sup>2</sup> ) |
|---------|-------|------|-----------|-----------|-----------|-----------------------|
| Ba (2+) | 8h    | m.2m | 0.6722(1) | 0.1722(1) | 0         | 0.0091(1)             |
| Fe (3+) | 8f    | 4..  | 1/2       | 1/2       | 0.8604(1) | 0.0072(1)             |
| As (3+) | 16l   | ..m  | 0.8639(1) | 0.3639(1) | 0.8345(1) | 0.0086(1)             |
| O1 (2-) | 8g    | 2.mm | 1/2       | 0         | 0.1175(2) | 0.0123(5)             |
| O2 (2-) | 32m   | 1    | 0.7093(1) | 0.4241(1) | 0.8965(1) | 0.0120(3)             |
| O3 (2-) | 4a    | 422  | 1/2       | 1/2       | 3/4       | 0.0210(8)             |

Table S2h. Anisotropic thermal displacement (in Å<sup>2</sup>) for Ba<sub>2</sub>Fe<sub>2</sub>O(As<sub>2</sub>O<sub>5</sub>)<sub>2</sub>.

| Atom | U <sub>11</sub> | U <sub>22</sub> | U <sub>33</sub> | U <sub>12</sub> | U <sub>13</sub> | U <sub>23</sub> |
|------|-----------------|-----------------|-----------------|-----------------|-----------------|-----------------|
| Ba   | 0.0085(1)       | 0.0085(1)       | 0.0103(1)       | -0.0006(1)      | 0.0000          | 0.0000          |
| Fe   | 0.0065(1)       | 0.0065(1)       | 0.0086(2)       | 0.0000          | 0.0000          | 0.0000          |
| As   | 0.0082(1)       | 0.0082(1)       | 0.0094(1)       | -0.0009(1)      | -0.0003(1)      | -0.0003(1)      |
| O1   | 0.0105(6)       | 0.0105(6)       | 0.0158(12)      | 0.0039(9)       | 0.0000          | 0.0000          |
| O2   | 0.0074(5)       | 0.0120(6)       | 0.0165(6)       | 0.0013(4)       | 0.0005(4)       | 0.0012(5)       |
| O3   | 0.0253(12)      | 0.0253(12)      | 0.0124(17)      | 0.0000          | 0.0000          | 0.0000          |



Table S2i. Pertinent interatomic distances (Å) and corresponding bond-valence sum calculations for Ba<sub>2</sub>Fe<sub>2</sub>O(As<sub>2</sub>O<sub>5</sub>)<sub>2</sub>.

| Ba            |                 | Fe            |                  |
|---------------|-----------------|---------------|------------------|
| Ba—O1         | 2.8342(17)      | Fe—O2         | 2.0152(11)       |
| Ba—O1         | 2.8342(17)      | Fe—O2         | 2.0152(11)       |
| Ba—O2         | 2.7660(13)      | Fe—O2         | 2.0152(11)       |
| Ba—O2         | 2.9085(13)      | Fe—O2         | 2.0152(11)       |
| Ba—O2         | 2.9086(13)      | Fe—O3         | 1.7775(6)        |
| Ba—O2         | 2.7660(13)      | Fe—Fe         | 3.5551(8)        |
| Ba—O2         | 2.7660(13)      | As            |                  |
| Ba—O2         | 2.9085(13)      | As—O1         | 1.8391(11)       |
| Ba—O2         | 2.9086(13)      | As—O2         | 1.7503(12)       |
| Ba—O2         | 2.7660(13)      | As—O2         | 1.7503(12)       |
| <b>BVS Ba</b> | <b>2.285(3)</b> | <b>BVS Fe</b> | <b>2.2953(4)</b> |
| <b>BVS As</b> | <b>3.094(6)</b> | <b>BVS O1</b> | <b>2.200(4)</b>  |
| <b>BVS O2</b> | <b>2.069(4)</b> | <b>BVS O3</b> | <b>1.902(2)</b>  |

Table S2j. Atomic positions and equivalent isotropic thermal displacement (in Å<sup>2</sup>) for Fe<sub>3</sub>(As<sub>2</sub>O<sub>5</sub>)(AsO<sub>3</sub>)Cl.

| Atom       | Wick. | Site | x           | y            | z           | Ueq (Å <sup>2</sup> ) |
|------------|-------|------|-------------|--------------|-------------|-----------------------|
| Fe1 (3+)   | 1a    | -1   | 0           | 0            | 0           | 0.0084(5)             |
| Fe2 (2+)   | 1h    | -1   | 1/2         | -1/2         | 1/2         | 0.0137(6)             |
| Fe3 (3+)   | 2i    | 1    | 0.58463(19) | -0.27586(12) | 0.12719(11) | 0.0081(4)             |
| Fe4 (2.5+) | 2i    | 1    | -0.3011(2)  | 0.34295(13)  | 0.12287(12) | 0.0101(4)             |
| As1 (3+)   | 2i    | 1    | 0.28644(14) | 0.07443(9)   | 0.21285(8)  | 0.0092(3)             |
| As2 (3+)   | 2i    | 1    | 0.89118(14) | -0.23947(9)  | 0.34916(8)  | 0.0100(3)             |
| As3 (3+)   | 2i    | 1    | 0.15656(15) | -0.54602(10) | 0.23166(9)  | 0.0138(3)             |
| Cl1 (1-)   | 2i    | 1    | -0.3176(4)  | 0.2558(2)    | 0.3881(2)   | 0.0188(7)             |
| O1 (2-)    | 2i    | 1    | 0.8363(9)   | -0.1512(6)   | 0.1583(5)   | 0.0094(11)            |
| O2 (2-)    | 2i    | 1    | 0.3685(9)   | -0.4411(6)   | 0.1084(5)   | 0.0116(11)            |
| O3 (2-)    | 2i    | 1    | 0.6417(9)   | -0.3396(6)   | 0.3477(5)   | 0.0115(11)            |
| O4 (2-)    | 2i    | 1    | 0.3104(9)   | -0.0864(6)   | 0.1246(5)   | 0.0101(11)            |
| O5 (2-)    | 2i    | 1    | 0.4505(9)   | 0.2098(6)    | 0.0899(5)   | 0.0079(10)            |
| O6 (2-)    | 2i    | 1    | -0.1295(9)  | 0.5302(6)    | 0.1290(5)   | 0.0110(11)            |
| O7 (2-)    | 2i    | 1    | -0.0125(9)  | 0.1621(6)    | 0.1198(5)   | 0.0103(11)            |
| O8 (2-)    | 2i    | 1    | 1.1425(9)   | -0.4177(6)   | 0.3521(5)   | 0.0117(11)            |

Table S2k. Anisotropic thermal displacement (in Å<sup>2</sup>) for Fe<sub>3</sub>(As<sub>2</sub>O<sub>5</sub>)(AsO<sub>3</sub>)Cl.

| Atom | U <sub>11</sub> | U <sub>22</sub> | U <sub>33</sub> | U <sub>12</sub> | U <sub>13</sub> | U <sub>23</sub> |
|------|-----------------|-----------------|-----------------|-----------------|-----------------|-----------------|
| Fe1  | 0.0052(8)       | 0.0088(7)       | 0.0103(8)       | -0.0029(6)      | 0.0007(7)       | -0.0007(6)      |
| Fe2  | 0.0112(9)       | 0.0178(8)       | 0.0112(8)       | -0.0094(7)      | 0.0026(7)       | 0.0011(6)       |
| Fe3  | 0.0044(5)       | 0.0089(5)       | 0.0111(6)       | -0.0012(4)      | 0.0004(5)       | -0.0031(4)      |
| Fe4  | 0.0054(6)       | 0.0119(5)       | 0.0135(6)       | -0.0026(4)      | 0.0016(5)       | -0.0041(4)      |
| As1  | 0.0064(4)       | 0.0110(4)       | 0.0106(4)       | -0.0039(3)      | 0.0013(3)       | -0.0024(3)      |
| As2  | 0.0052(4)       | 0.0142(4)       | 0.0112(4)       | -0.0035(3)      | -0.0006(3)      | -0.0037(3)      |
| As3  | 0.0068(4)       | 0.0152(4)       | 0.0186(5)       | -0.0037(3)      | 0.0007(4)       | -0.0030(3)      |
| Cl1  | 0.0145(10)      | 0.0223(10)      | 0.0164(10)      | -0.0026(8)      | 0.0005(9)       | -0.0022(8)      |

Table S2l. Pertinent interatomic distances (Å) and corresponding bond-valence sum calculations for Fe<sub>3</sub>(As<sub>2</sub>O<sub>5</sub>)(AsO<sub>3</sub>)Cl.

|                | As         | Fe                       | Fe                       |
|----------------|------------|--------------------------|--------------------------|
| As1—Fe1        | 2.8910(12) | Fe1—O1 2.019(5)          | Fe3—Fe4 3.196(2)         |
| As1—O4         | 1.802(6)   | Fe1—O1 2.019(5)          | Fe3—Fe4 3.136(2)         |
| As1—O5         | 1.774(5)   | Fe1—O4 1.978(5)          | Fe3—O1 1.991(6)          |
| As1—O7         | 1.791(5)   | Fe1—O4 1.978(5)          | Fe3—O2 2.073(6)          |
| -              | -          | Fe1—O7 2.042(6)          | Fe3—O3 2.035(5)          |
| As2—Fe3        | 2.8649(17) | Fe1—O7 2.042(6)          | Fe3—O4 1.972(5)          |
| As2—O1         | 1.764(5)   | -                        | Fe3—O5 1.992(5)          |
| As2—O3         | 1.768(6)   | Fe2—Cl1 2.645(2)         | Fe3—O6 2.038(5)          |
| As2—O8         | 1.832(5)   | Fe2—Cl1 2.645(2)         | -                        |
| -              | -          | Fe2—O3 1.961(5)          | Fe4—Cl1 2.441(3)         |
| As3—Fe4        | 3.1668(18) | Fe2—O3 1.961(5)          | Fe4—O2 2.286(5)          |
| As3—Cl1        | 3.179(2)   | Fe2—O8 2.303(5)          | Fe4—O2 2.134(5)          |
| As3—O2         | 1.831(5)   | Fe2—O8 2.303(5)          | Fe4—O5 2.035(6)          |
| As3—O5         | 3.024(5)   | -                        | Fe4—O6 2.033(6)          |
| As3—O6         | 1.766(5)   | -                        | Fe4—O7 1.988(5)          |
| As3—O8         | 1.811(6)   | -                        | -                        |
| <b>BVS As1</b> | 3.00(2)    | <b>BVS As2</b> 3.02(2)   | <b>BVS As3</b> 2.94(2)   |
| <b>BVS Fe1</b> | 3.030(17)  | <b>BVS Fe2</b> 2.064(12) | <b>BVS Fe3</b> 3.001(17) |
| <b>BVS Fe4</b> | 2.480(14)  | -                        | <b>BVS Cl1</b> 0.611(3)  |
| <b>BVS O1</b>  | 2.099(17)  | <b>BVS O2</b> 1.925(15)  | <b>BVS O3</b> 2.112(19)  |
| <b>BVS O4</b>  | 2.081(18)  | <b>BVS O5</b> 2.084(17)  | <b>BVS O6</b> 2.012(17)  |
| <b>BVS O7</b>  | 1.998(16)  | <b>BVS O8</b> 2.063(19)  | -                        |

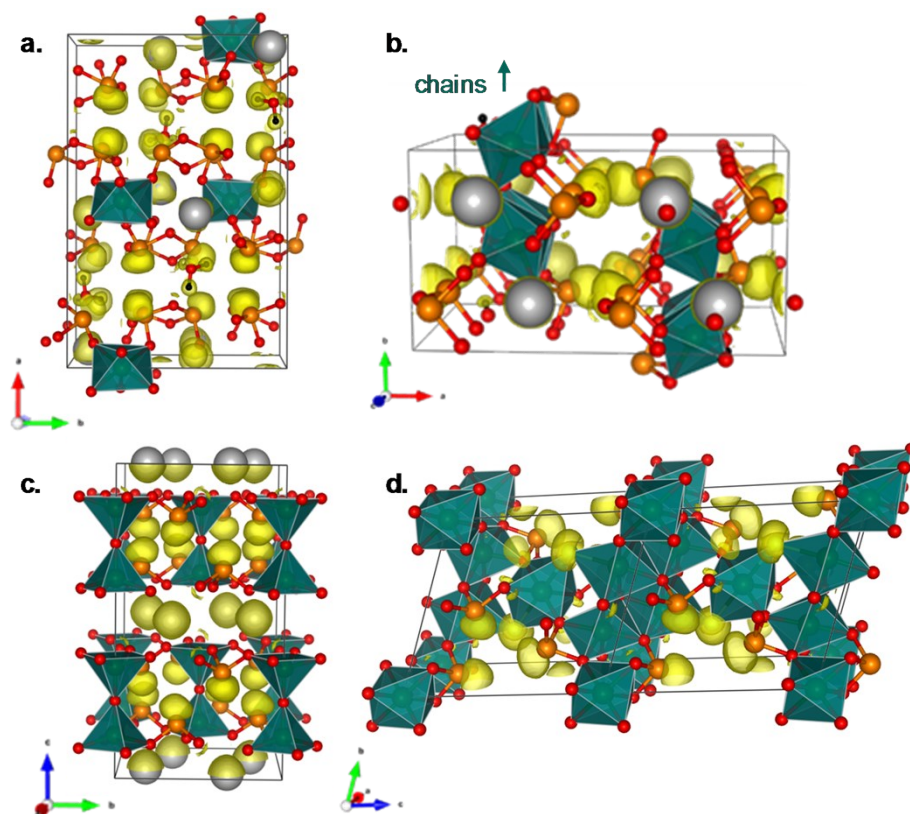

Figure S2m. Snapshots of the ELF function with evidence of the  $\text{As}^{3+}$  electronic lone pair (in yellow) from DFT calculations for  $\text{Ba}_2\text{Fe}(\text{As}_3\text{O}_6)_2 \cdot \text{H}_2\text{O}$ ,  $\text{BaFe}_2\text{As}_2\text{O}_5\text{AsO}_3\text{OH}$ ,  $\text{Ba}_2\text{Fe}_2\text{O}(\text{As}_2\text{O}_5)_2$  and  $\text{Fe}_3(\text{As}_2\text{O}_5)(\text{AsO}_3)\text{Cl}$  (a,b,c,d respectively). These representations were drawn at  $\eta(r) = 0.7379$ ,  $0.7232$ ,  $0.7155$  and  $0.7010$  isosurface respectively.

## INFRARED SPECTROSCOPIES

For  $\text{BaFe}_2\text{As}_2\text{O}_5\text{AsO}_3\text{OH}$  (compound **(2)**), the structure being rather complex mixing ortho and pyro-arsenites, the precise assignment of all the bands is complicated, by band overlap, and possible contribution of secondary phases. However, the presence of hydroxides is confirmed by a stretching and in plane deformation modes seen around 3435 and 1415  $\text{cm}^{-1}$  respectively (see Fig. 2a, marked in blue). As-O stretching modes in  $\text{As}_2\text{O}_5$  groups and  $\text{AsO}_3$  groups respectively can be seen around 895 and 875/840  $\text{cm}^{-1}$  region, while the bands around 675/ 615  $\text{cm}^{-1}$  correspond to stretching modes in  $\text{AsO}_2\text{-O-AsO}_2$  bridges groups.<sup>1-4</sup> Bands around 520, 440 and 415  $\text{cm}^{-1}$  might be assigned to various As-O bending modes. Finally, the bands around 855, 777, 700  $\text{cm}^{-1}$  are assigned to Fe-O bending in iron octahedra.

In the case of  $\text{Fe}_3(\text{As}_2\text{O}_5)(\text{AsO}_3)\text{Cl}$  (compound **(4)**) most of the bands related to chloride bonding are usually found below 400  $\text{cm}^{-1}$ , thus not shown here.<sup>4</sup> Similarly to compound **(1)**, the bands observed around 750, 665 and 610  $\text{cm}^{-1}$  can be attributed to As-O stretching in  $\text{AsO}_3$ ,  $\text{As}_2\text{O}_5$  and  $\text{AsO}_2\text{-O-AsO}_2$  groups respectively, while the bands around 525, 480 and 430  $\text{cm}^{-1}$  can be attributed to bending modes in  $\text{As}_2\text{O}_5$ ,  $\text{AsO}_3$  and  $\text{AsO}_2\text{-O-AsO}_2$  groups.<sup>1-4</sup> However, one must note that the Fe-O stretching vibration in iron octahedra can also be seen in the 750 and 650  $\text{cm}^{-1}$  domain, making it difficult to exactly assign the bands.<sup>4</sup>

1 F. A. Miller and C. H. Wilkins, *Infrared Spectra and Characteristic Frequencies of Inorganic Ions*, *Anal. Chem.*, 1952, **24**, 1253–1294.

2 H. A. Szymanski, L. Marabella, J. Hoke and J. Harter, *Infrared and Raman Studies of Arsenic Compounds*, *Appl. Spectrosc.*, 1968, **22**, 297–304.

3 S. Goldberg and C. T. Johnston, *Mechanisms of arsenic adsorption on amorphous oxides evaluated using macroscopic measurements, vibrational spectroscopy, and surface complexation modeling*, *J. Colloid Interface Sci.*, 2001, **234**, 204–216.

4 K. Nakamoto, *Infrared and Raman Spectra of Inorganic and Coordination Compounds: Part A: Theory and Applications in Inorganic Chemistry*, 2009.

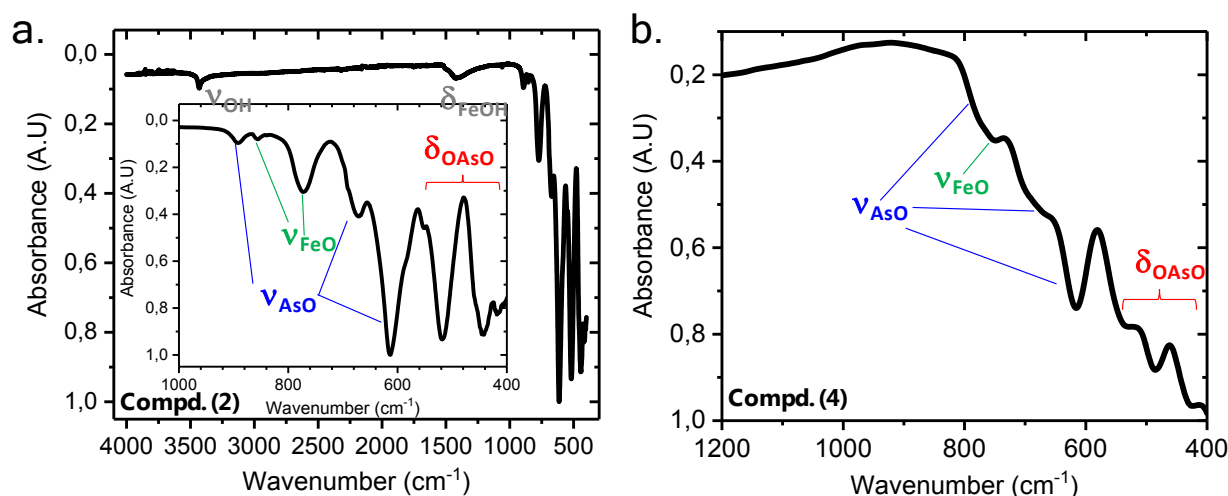

Figure S2n. Spectroscopies: a) IR spectra for  $\text{BaFe}_2(\text{As}_2\text{O}_5)(\text{AsO}_3)(\text{OH})$  (compound **(2)**). b) IR spectra for  $\text{Fe}_3(\text{As}_2\text{O}_5)(\text{AsO}_3)\text{Cl}$  (compound **(4)**).

**(S3) EDS-SEM analysis.**

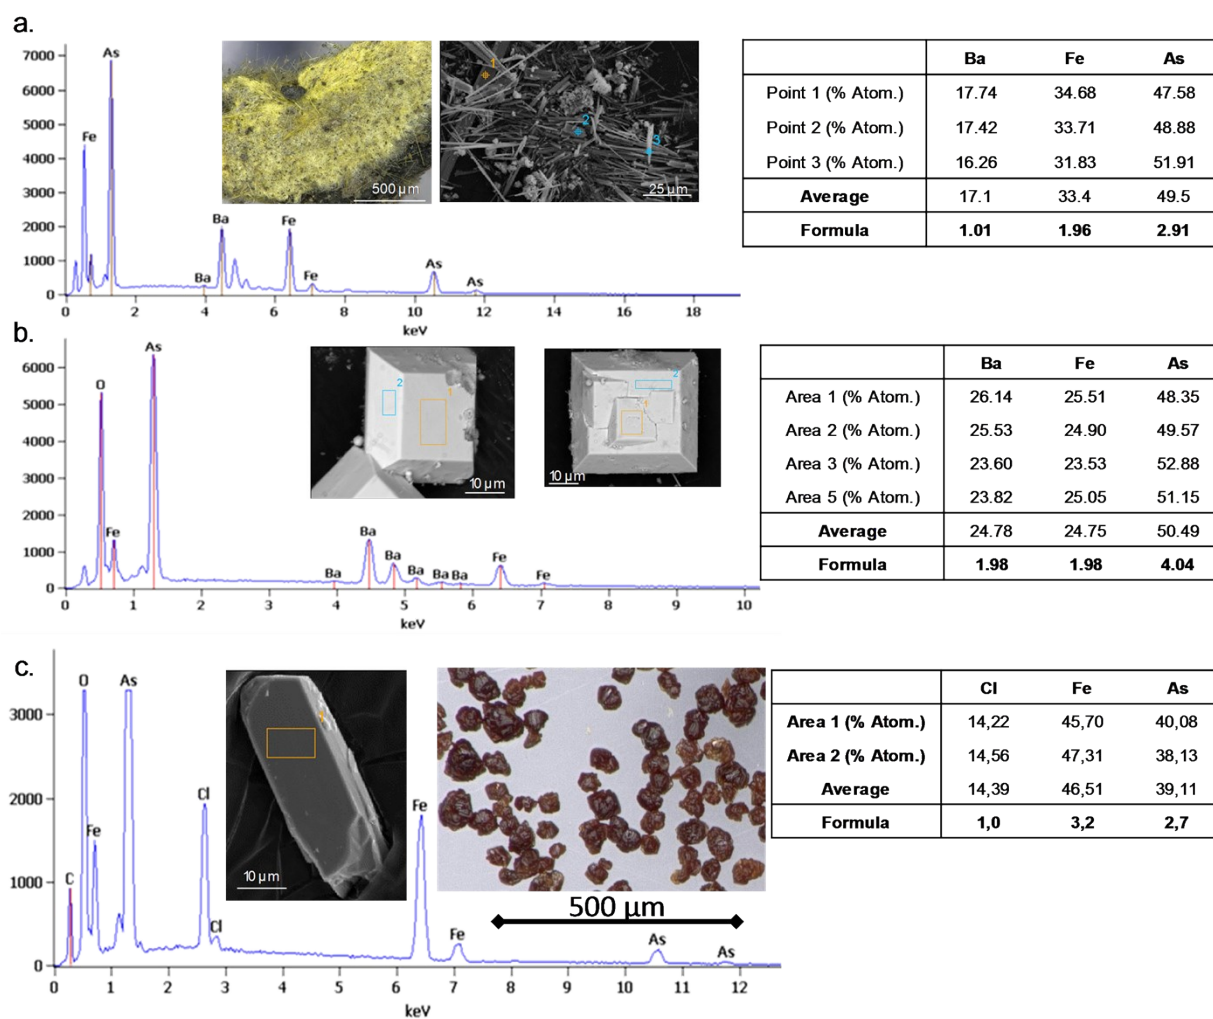

Figure S3. EDS-SEM analysis, and resulting formula obtained from several averaged % Atomic points acquisition for  $\text{BaFe}_2\text{As}_2\text{O}_5\text{AsO}_3\text{OH}$ ,  $\text{Ba}_2\text{Fe}_2\text{O}(\text{As}_2\text{O}_5)_2$  and  $\text{Fe}_3(\text{As}_2\text{O}_5)(\text{AsO}_3)\text{Cl}$  (a,b,c respectively).

#### (S4) DFT calculations details.

Table S4a. Relative energies for the different magnetic configurations used to extract the two magnetic exchanges parameters ( $J_1$ ,  $J_2$ ) within  $\text{Ba}_2\text{Fe}(\text{As}_3\text{O}_6)_2 \cdot \text{H}_2\text{O}$  structure, at  $U_{\text{eff}} = 6 \text{ eV}$ . The most stable configuration was shifted to  $E = 0$ . The values are really low, in agreement with our statement (highly disconnected octahedral leading to a paramagnetic behaviour). FM values are represented negative, while AFM are positive.

| $\text{Ba}_2\text{Fe}(\text{As}_2\text{O}_3)_3 \cdot \text{H}_2\text{O}$ |       | $U = 6 \text{ eV}$ |
|--------------------------------------------------------------------------|-------|--------------------|
| Relative energies<br>(eV/unit cell)                                      | FM    | 0.00155            |
|                                                                          | AF1   | 0.00028            |
|                                                                          | AF2   | 0.00199            |
|                                                                          | AF3   | 0                  |
| Spin exchange<br>parameters (K)                                          | $J_1$ | +0.23              |
|                                                                          | $J_2$ | -0.14              |

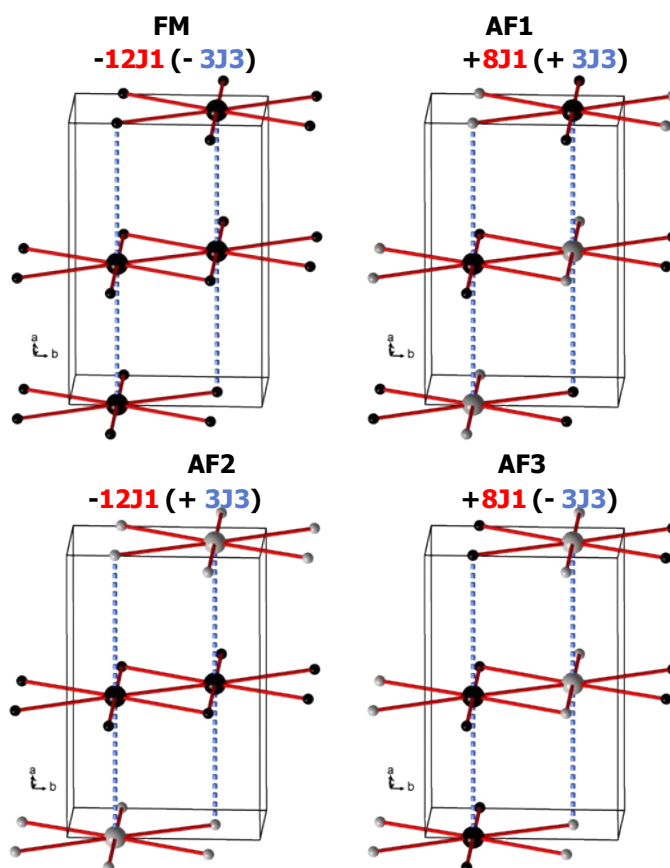

Figure S4b. Representation of the four ordered spin states (FM, AF1, AF2, AF3) employed to probe the magnetically disconnected and paramagnetic behaviour of  $\text{Ba}_2\text{Fe}(\text{As}_3\text{O}_6)_2 \cdot \text{H}_2\text{O}$  structure. Only  $\text{Fe}^{3+}$  sites are represented for clarity. Up spin  $\text{Fe}^{3+}$  sites are represented in black filled circles, while down spins are represented in white filled circle. The 4  $\text{Fe}^{3+}$  cations inside the primitive cell display larger radius.

Table S4c. Values of the geometrical parameters (distances in Å and angles in °) along the magnetic exchanges paths for BaFe<sub>2</sub>As<sub>2</sub>O<sub>5</sub>AsO<sub>3</sub>OH structure a x b x 2c cell at U = 6 eV. FM values are represented negative, while AFM are positive.

| Path               | Path           | Fe...Fe<br>(Å) | Fe-O<br>(Å) | O...O<br>(Å) | O-Fe<br>(Å) | ∠ Fe-O-Fe<br>τ Fe-O-O-Fe<br>(deg) | U = 6 eV<br>J (K) |
|--------------------|----------------|----------------|-------------|--------------|-------------|-----------------------------------|-------------------|
| <b>SE</b>          |                |                |             |              |             |                                   |                   |
| <b>J1</b>          | In chains      | 3,104(1)       | 2.035(1)    | -            | 2.035(1)    | 99                                | +28.56            |
| <b>J2</b>          | In chains      | 3.691(1)       | 2.077(1)    | -            | 1.988(1)    | 130.5                             | +6.57             |
| <b>SSE</b>         |                |                |             |              |             |                                   |                   |
| <b>Jd</b>          | In chains      | 4.823(1)       | 1.988(1)    | 2.542(1)     | 2.084(1)    | 187.5                             | -3.29             |
| <b>« No path »</b> |                |                |             |              |             |                                   |                   |
| <b>J3</b>          | Between Chains | 5.910(2)       | -           | -            | -           | « 0 »                             | +0.69             |
| <b>J4</b>          | Between Layers | 6.619(3)       | -           | -            | -           | « 79.2 »                          | -0.003            |

Table S4d. Relative energies for the different magnetic configurations used to extract the magnetic exchanges parameters for BaFe<sub>2</sub>As<sub>2</sub>O<sub>5</sub>AsO<sub>3</sub>OH structure within a x b x 2c, and U<sub>eff</sub> = 6 eV. The most stable configuration was shifted to E = 0. FM values are represented negative, while AFM are positive.

| BaFe <sub>2</sub> (As <sub>2</sub> O <sub>5</sub> )(AsO <sub>3</sub> )(OH) |                             | U = 6 eV |
|----------------------------------------------------------------------------|-----------------------------|----------|
| Relative energies<br>(eV/unit cell)                                        | FM                          | 0.59926  |
|                                                                            | AF1                         | 0.44403  |
|                                                                            | AF2                         | 0.00594  |
|                                                                            | AF3                         | 0        |
|                                                                            | AF4                         | 0.59287  |
|                                                                            | AF5                         | 0.58782  |
|                                                                            | AF6                         | 0.0474   |
|                                                                            | AF7                         | 0.43862  |
|                                                                            | AF8                         | 0.00005  |
|                                                                            | AF9                         | 0.59926  |
| Spin exchange<br>parameters (K)<br><br>(- = FM   + = AFM)                  | J1                          | +28.56   |
|                                                                            | J2                          | +6.57    |
|                                                                            | Jd                          | -3.29    |
|                                                                            | Jinter                      | +0.69    |
|                                                                            | J4                          | -0.003   |
|                                                                            | Total θ <sub>c</sub><br>(K) | -55.03   |



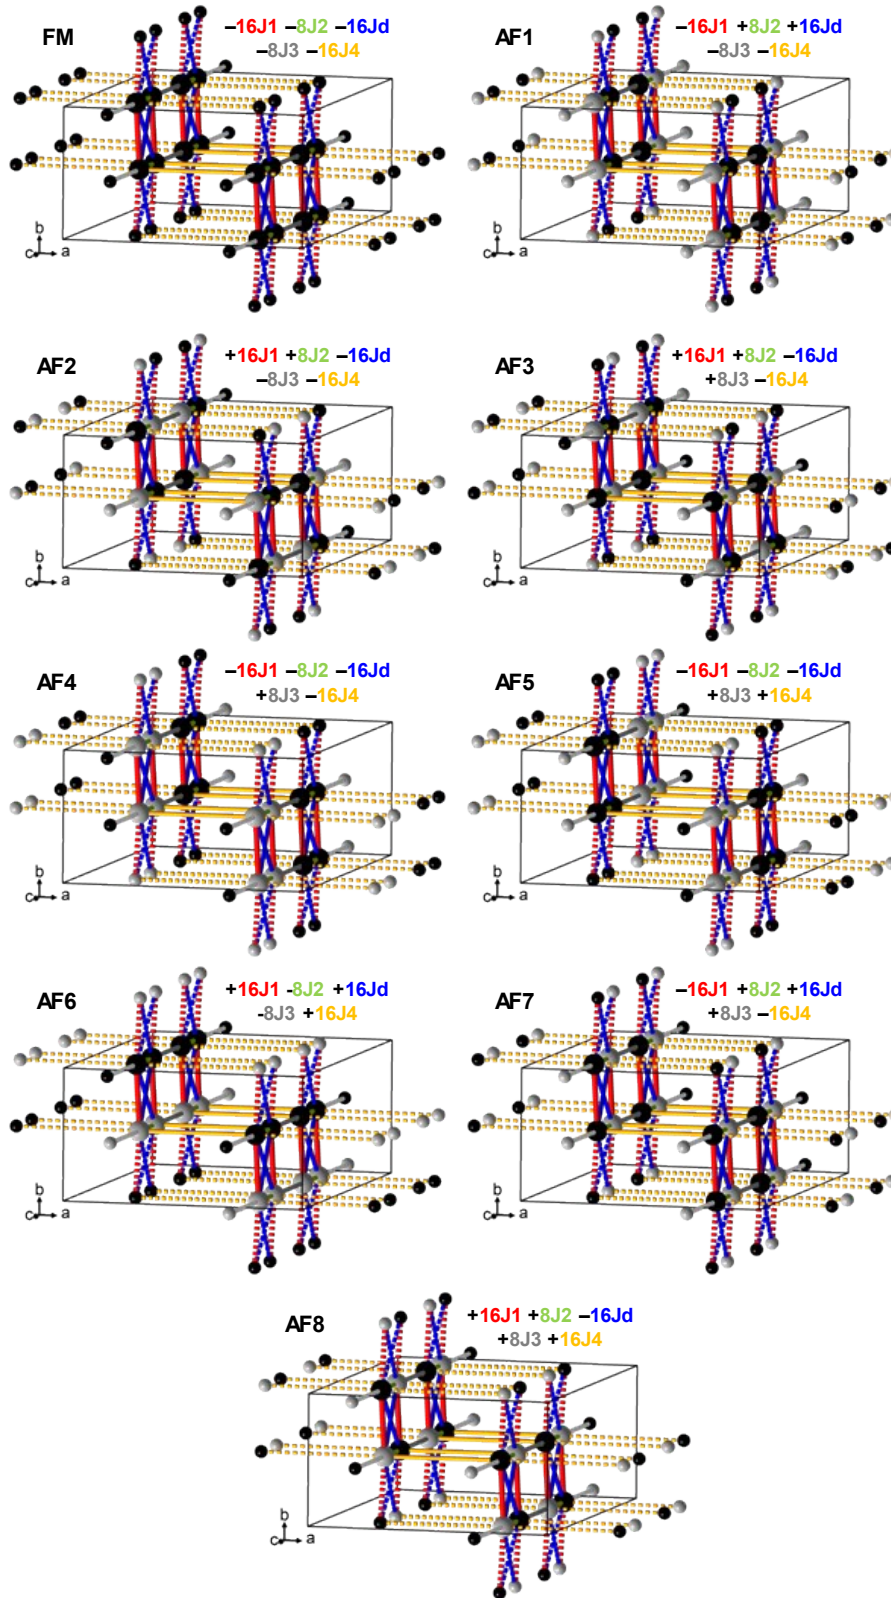

Figure S4e. Representation of the nine ordered spin states (FM, AF1, AF2, AF3, AF4, AF5, AF6, AF7, AF8) employed to extract the five spin exchange parameters ( $J_1$ ,  $J_2$ ,  $J_d$ ,  $J_3$ ,  $J_4$ ) for  $\text{BaFe}_2\text{As}_2\text{O}_5\text{AsO}_3\text{OH}$  structure within a “ $a \times b \times 2c$ ”. Only  $\text{Fe}^{3+}$  sites are represented for clarity. Up spin  $\text{Fe}^{3+}$  sites are represented in black filled circles, while down spin are represented in white filled circle. The 16  $\text{Fe}^{3+}$  cations inside the primitive cell display larger radius.

Table S4f. Values of the geometrical parameters (distances in Å and angles in °) along the magnetic exchanges paths for Ba<sub>2</sub>Fe<sub>2</sub>O(As<sub>2</sub>O<sub>5</sub>)<sub>2</sub> structure at U = 7 eV. FM values are represented negative, while AFM are positive.

| Path           | Path           | Fe...Fe<br>(Å) | Fe-O<br>(Å) | O...O<br>(Å) | O-Fe<br>(Å) | ∠ Fe-O-Fe<br>τ Fe-O-O-Fe<br>(deg) | U = 7 eV<br>J (K) |
|----------------|----------------|----------------|-------------|--------------|-------------|-----------------------------------|-------------------|
| <b>SE</b>      |                |                |             |              |             |                                   |                   |
| <b>Jdim</b>    | In dimers      | 3,555(1)       | 1,778(1)    | -            | 1,778(1)    | 180                               | +259.03           |
| <b>SSE</b>     |                |                |             |              |             |                                   |                   |
| <b>J2</b>      | Between dimers | 6,128(1)       | 2,015(1)    | 2,633(2)     | 2,015(1)    | 180                               | -3.33             |
| <b>No path</b> |                |                |             |              |             |                                   |                   |
| <b>J3</b>      | Between Layers | 4.498(1)       | -           | -            | -           | « 180 »                           | +1.28             |

Table S4g. Relative energies for the different magnetic configurations used to extract the magnetic exchanges parameters for Ba<sub>2</sub>Fe<sub>2</sub>O(As<sub>2</sub>O<sub>5</sub>)<sub>2</sub> structure, and U<sub>eff</sub> = 4 eV to 7 eV. The most stable configurations were shifted to E = 0 for each U<sub>eff</sub> values. FM values are represented negative, while AFM are positive.

| Ba <sub>2</sub> Fe <sub>2</sub> O(As <sub>2</sub> O <sub>5</sub> ) <sub>2</sub> |                                   | U = 4 eV | U = 6 eV | U = 7 eV |
|---------------------------------------------------------------------------------|-----------------------------------|----------|----------|----------|
| <b>Relative energies</b><br>(eV/unit cell)                                      | <b>FM</b>                         | 1.76997  | 1.35769  | 1.17905  |
|                                                                                 | <b>AF1</b>                        | 1.76057  | 1.35112  | 1.17353  |
|                                                                                 | <b>AF2</b>                        | 0.09374  | 0.06626  | 0.05523  |
|                                                                                 | <b>AF3</b>                        | 1.66171  | 1.28189  | 1.11606  |
|                                                                                 | <b>AF4</b>                        | 0        | 0        | 0        |
| <b>Spin exchange</b><br><b>parameters (K)</b><br>(- = FM   + = AFM)             | <b>Jdim</b>                       | +385.666 | +297.514 | +259.027 |
|                                                                                 | <b>J2</b>                         | -5.736   | -4.017   | -3.335   |
|                                                                                 | <b>J3</b>                         | +2.182   | +1.525   | +1.281   |
|                                                                                 | <b>Total θ<sub>c</sub></b><br>(K) | -373.508 | -288.997 | -251.971 |

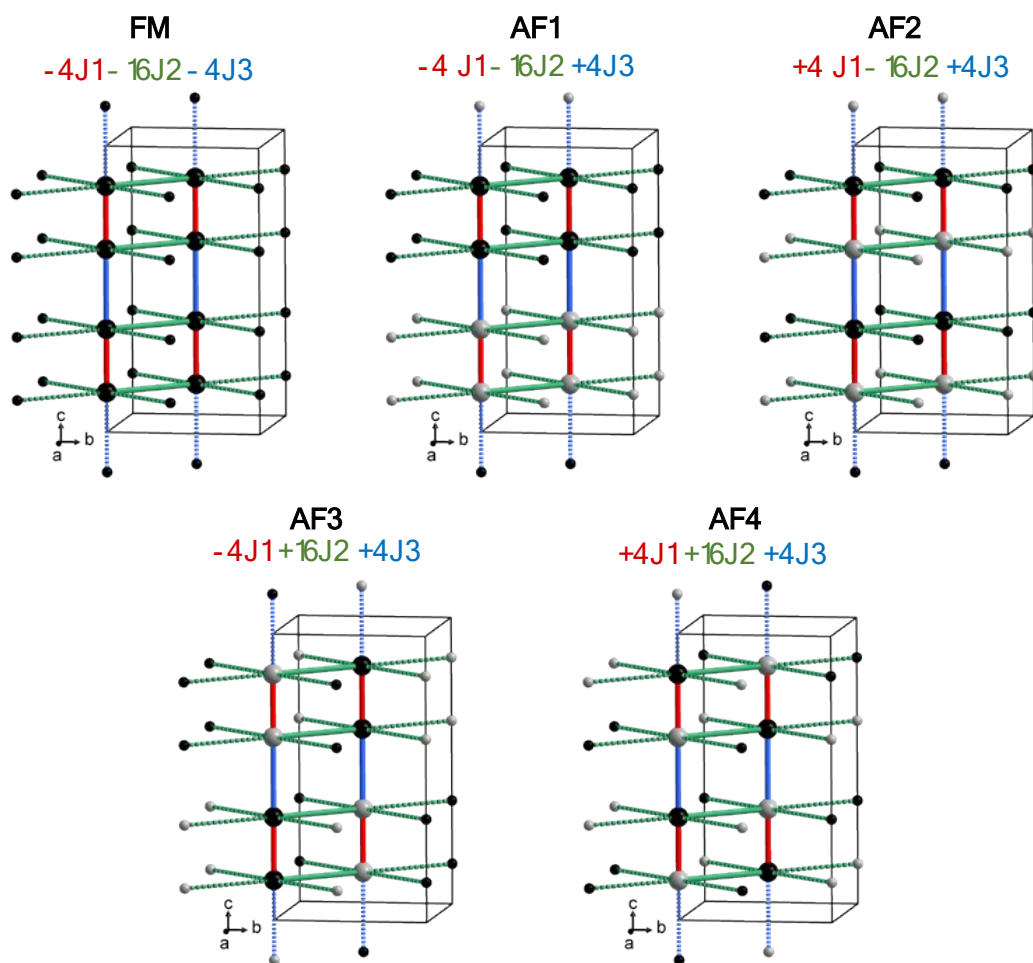

Figure S4h. Representation of the five ordered spin states (FM, AF1, AF2, AF3, AF4) employed to extract the three spin exchange parameters ( $J_1$ ,  $J_2$ ,  $J_3$ ) for  $\text{Ba}_2\text{Fe}_2\text{O}(\text{As}_2\text{O}_5)_2$  structure. Only  $\text{Fe}^{3+}$  sites are represented for clarity. Up spin  $\text{Fe}^{3+}$  sites are represented in black filled circles, while down spin are represented in white filled circle. The 8  $\text{Fe}^{3+}$  cations inside the primitive cell display larger radius.

Table S4i. Values of the geometrical parameters (distances in Å and angles in °) along the magnetic exchanges paths for  $\text{Fe}_3(\text{As}_2\text{O}_5)(\text{AsO}_3)\text{Cl}$  structure at  $U = 6$  eV. FM values are represented negative, while AFM are positive.

| Path           | Path    | Fe...Fe (Å) | Fe-O (Å)  | O...O (Å) | O-Fe (Å)  | $\angle$ Fe-O-Fe<br>τ Fe-O-O-Fe (deg) |
|----------------|---------|-------------|-----------|-----------|-----------|---------------------------------------|
| <b>SE</b>      |         |             |           |           |           |                                       |
| <b>J1</b>      | Fe4-Fe4 | 3.384(1)    | 2.286(5)  | -         | 2.1334(5) | 99.9(2)                               |
| <b>J2</b>      | Fe3-Fe2 | 3.5981(1)   | 1.961(5)  | -         | 2.035 (5) | 128.4(3)                              |
| <b>J3 (CI)</b> | Fe4-Fe2 | 4.297(1)    | 2.441(2)  | -         | 2.646(2)  | 115.26(8)                             |
| <b>J4</b>      | Fe3-Fe4 | 3.196(2)    | 2.286(5)  | -         | 2.073(6)  | 94.1(2)                               |
| <b>J5</b>      | Fe4-Fe1 | 3.578(1)    | 1.988(5)  | -         | 2.042(6)  | 125.2(3)                              |
| <b>J6</b>      | Fe3-Fe4 | 3.136(2)    | 2.073(6)  | -         | 2.134(5)  | 94.4(2)                               |
| <b>J6</b>      | -       | -           | 1.993(5)  | -         | 2.035(6)  | 102.2(2)                              |
| <b>J7</b>      | Fe3-Fe1 | 3.5645(9)   | 1.972 (5) | -         | 1.977(5)  | 128.9(3)                              |
| <b>J8</b>      | Fe3-Fe1 | 3.571(1)    | 1.991(6)  | -         | 2.019(5)  | 125.9(3)                              |
| <b>SSE</b>     |         |             |           |           |           |                                       |
| <b>J9</b>      | Fe3-Fe3 | 5.353(2)    | 2.073(6)  | 2.848(7)  | 2.073(6)  | 180.0(2)                              |
| <b>J10</b>     | Fe4-Fe1 | 5.630(1)    | 2.042(6)  | 2.676(7)  | 2.035(6)  | 171.0(4)                              |
| <b>J11</b>     | Fe1-Fe1 | 5.5346(1)   | 1.977(5)  | 2.851(7)  | 2.019(5)  | 25.7(6)                               |

Table S4j. Relative energies for the different magnetic configurations used to extract the magnetic exchanges parameters trends for  $\text{Fe}_3(\text{As}_2\text{O}_5)(\text{AsO}_3)\text{Cl}$  structure at  $U = 6$  eV. The most stable configurations were shifted to  $E = 0$  for each  $U_{\text{eff}}$  values.

| <b>Fe3(As2O5)(AsO3)Cl</b>                   |            | <b>U = 6 eV</b> |
|---------------------------------------------|------------|-----------------|
| <b>Relative energies<br/>(eV/unit cell)</b> | <b>FM</b>  | 0.03715         |
|                                             | <b>AF1</b> | 0.00494         |
|                                             | <b>AF2</b> | 0.00297         |
|                                             | <b>AF3</b> | <b>0</b>        |
|                                             | <b>AF4</b> | 0.00121         |
|                                             | <b>AF5</b> | 0.14171         |

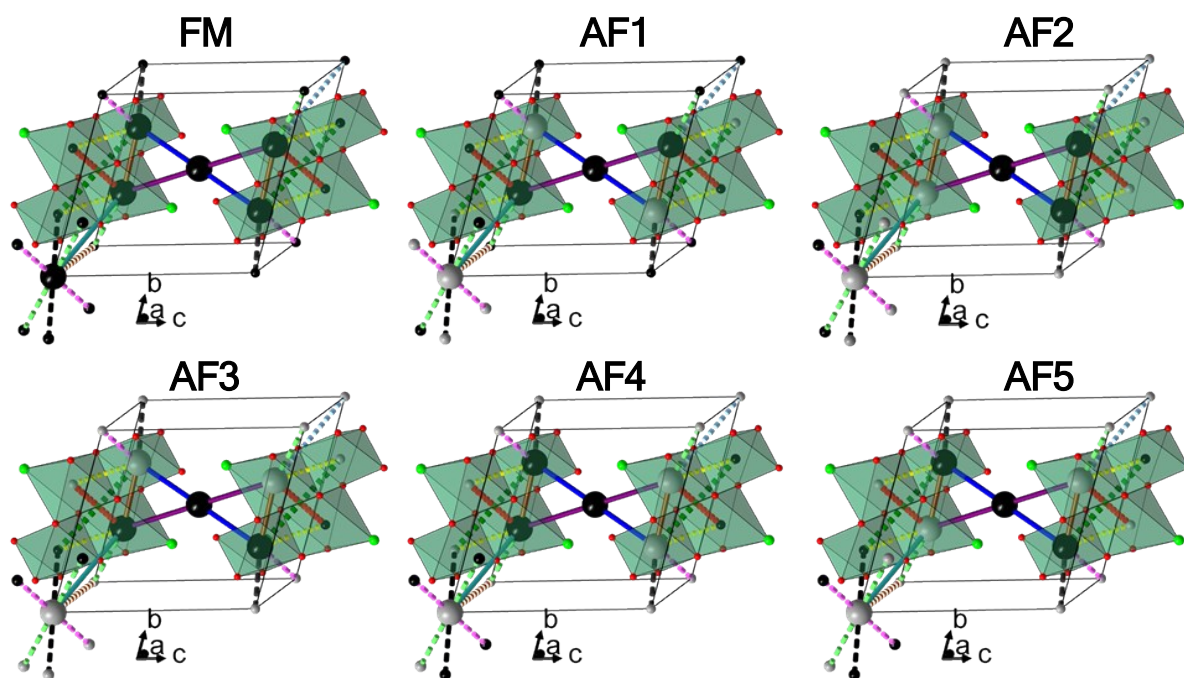

Figure S4k. Representation of the six pertinent ordered spin stated (FM, AF1, AF2, AF3, AF4, AF5) employed to extract the global trends in couplings for  $\text{Fe}_3(\text{As}_2\text{O}_5)(\text{AsO}_3)\text{Cl}$  structure, within a single unit cell. Only  $\text{Fe}^{3+}$  sites are represented for clarity. Up spin  $\text{Fe}^{3+}$  sites are represented in black filled circles, while down spin are represented in white filled circle. The 6 Fe cations inside the primitive cell display larger radius.

Table S4l. Comparison between the crystallographically calculated BVS and obtained magnetic moment (in  $\mu_B/\text{Fe}$ ) from DFT calculations for each Fe cations within the simple cell  $\text{Fe}_3(\text{As}_2\text{O}_5)(\text{AsO}_3)\text{Cl}$  structure at  $U = 6$  eV. The results are in favour of a  $\text{Fe}^{3+}/\text{Fe}^{2+}$  charge ordering on the Fe4 sites.

|     | BVS     | FM<br>( $U = 6$ eV)          | AF1<br>( $U = 6$ eV)         | AF2<br>( $U = 6$ eV)         | AF3<br>( $U = 6$ eV)         | AF4<br>( $U = 6$ eV)         | AF5<br>( $U = 6$ eV)         |
|-----|---------|------------------------------|------------------------------|------------------------------|------------------------------|------------------------------|------------------------------|
|     |         | M ( $\mu_B/\text{Fe}$ )      |
| Fe1 | 3.03(2) | 4.376                        | 4.355                        | 4.345                        | 4.346                        | 4.345                        | 4.333                        |
| Fe2 | 2.06(1) | 3.769                        | 3.741                        | 3.750                        | 3.749                        | 3.749                        | 3.762                        |
| Fe3 | 3.00(2) | 4.357<br>4.356               | 4.340<br>4.341               | 4.348<br>4.330               | <b>3.444</b><br><b>4.331</b> | 4.330<br>4.348               | 4.330<br>4.330               |
| Fe4 | 2.48(2) | <b>4.335</b><br><b>3.767</b> | <b>3.730</b><br><b>4.308</b> | <b>4.323</b><br><b>3.731</b> | <b>3.733</b><br><b>4.321</b> | <b>3.731</b><br><b>4.323</b> | <b>4.063</b><br><b>4.096</b> |

### (S5) Magnetic measurements details.

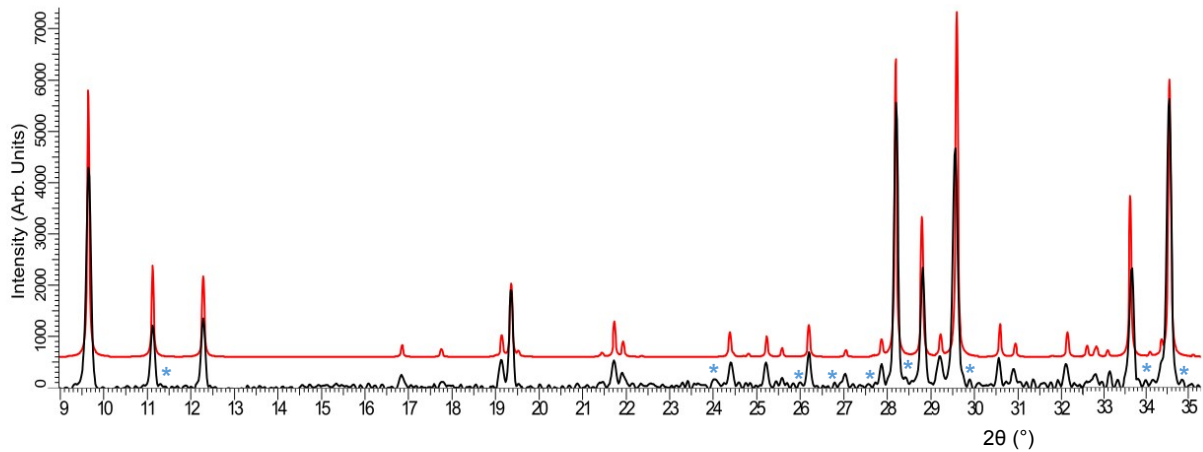

Figure S5a. Comparison between the experimental measured XRD powder diagram (in black) and the simulated one from our crystallographic model (in red) for  $\text{Fe}_3(\text{As}_2\text{O}_5)(\text{AsO}_3)\text{Cl}$ . Blue stars stand for the impurity peaks, identified as  $\gamma\text{-Fe}_2\text{O}_3$ .

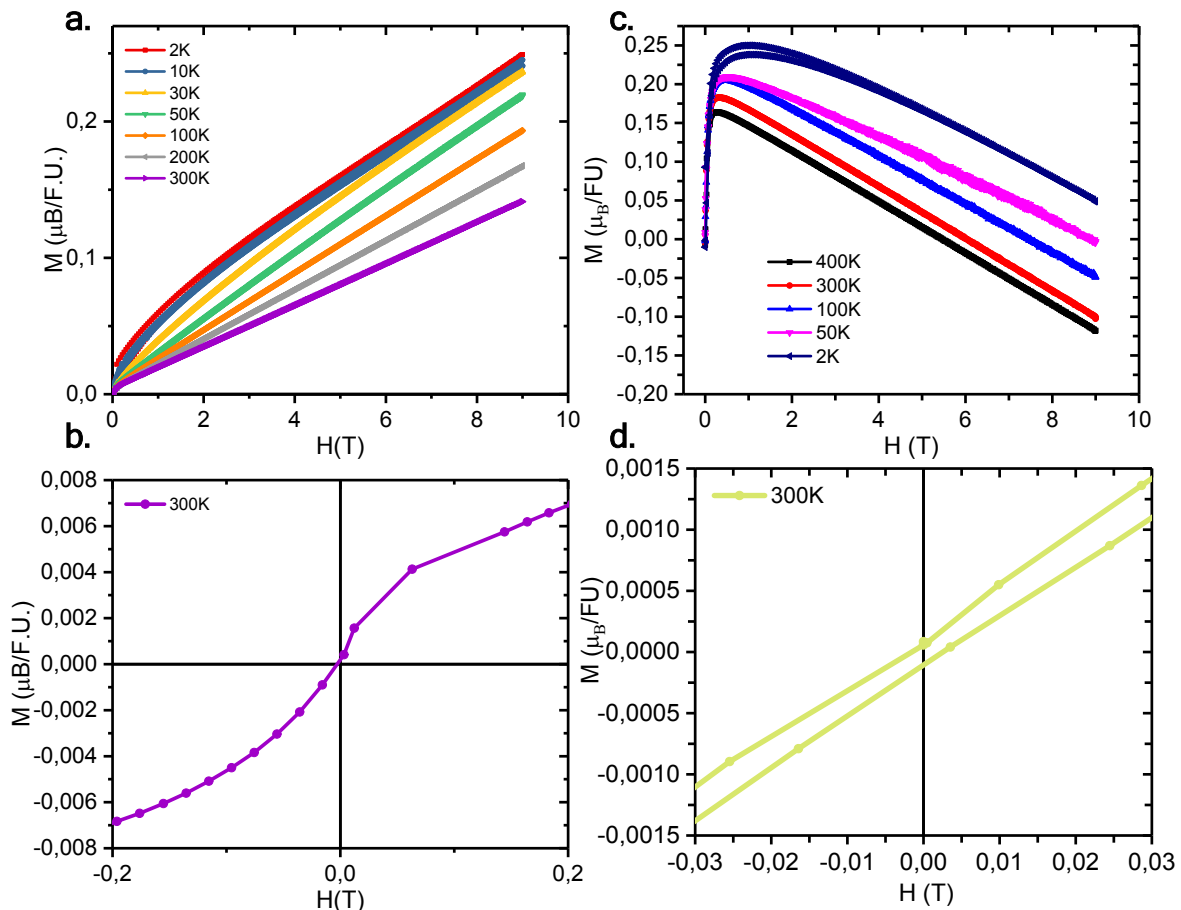

Figure S5b. a)  $M(H)$  measurement between 0 and 9 T for  $\text{BaFe}_2(\text{As}_2\text{O}_5)(\text{AsO}_3)(\text{OH})$ , b) Highlighting the hysteresis at room temperature due to the presence of magnetic impurity in the sample. c)  $M(H)$  measurement between 0 and 9 T for  $\text{Ba}_2\text{Fe}_2\text{O}(\text{As}_2\text{O}_5)_2$  d) Highlighting the small hysteresis observed in the  $\text{Fe}_3(\text{As}_2\text{O}_5)(\text{AsO}_3)\text{Cl}$  magnetic measurements, resulting from the presence of  $\gamma\text{-Fe}_2\text{O}_3$ .
